# Supplementary material for: Acylselenoureato bis(chelates) of lead: synthesis, structural characterization and microwave-assisted formation of PbSe nano- and microstructures
Source: Royal Society of Chemistry journal article supplement (doi:10.1039/d0nj01433h), 2020-01-01
Supplement: d0nj01433h1.pdf [file d0nj01433h1.pdf]

## Electronic Supplementary Information (ESI)

# Acylselenoureato bis(chelates) of lead: Synthesis, Structural characterisation and Microwave-assisted formation of PbSe nano and microstructures

Karsten Klauke,<sup>a,b</sup> Alexa Schmitz,<sup>b</sup> Ann-Christin Swertz,<sup>a</sup> Björn B. Beele,<sup>a</sup> Beatriz Giesen,<sup>b</sup> Carsten Schlüsener,<sup>b</sup> Christoph Janiak<sup>b,\*</sup> and Fabian Mohr<sup>a,\*</sup>

*a* Fakultät für Mathematik und Naturwissenschaften, Anorganische Chemie, Bergische Universität Wuppertal, 42119 Wuppertal, Germany

*b* Institut für Anorganische Chemie und Strukturchemie, Heinrich-Heine-Universität Düsseldorf, 40204 Düsseldorf, Germany

Corresponding authors E-mail: [janiak@hhu.de](mailto:janiak@hhu.de), [fmohr@uni-wuppertal.de](mailto:fmohr@uni-wuppertal.de)

### Content:

- I Thermal analysis
- II Supplementary information on the particle characterization  
(TEM images, particle-size distributions, EDX spectra and SAED analysis)
- III Crystallographic and refinement details

## Section SI. Thermal analysis

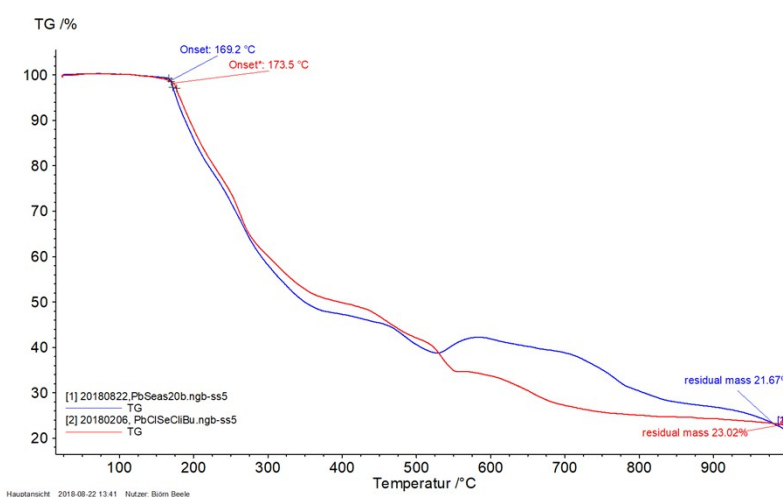

**Fig. S1** TGA curves of complexes **1a** (blue) and **3a** (red).

## Section SII. Supplementary information on the particle characterization

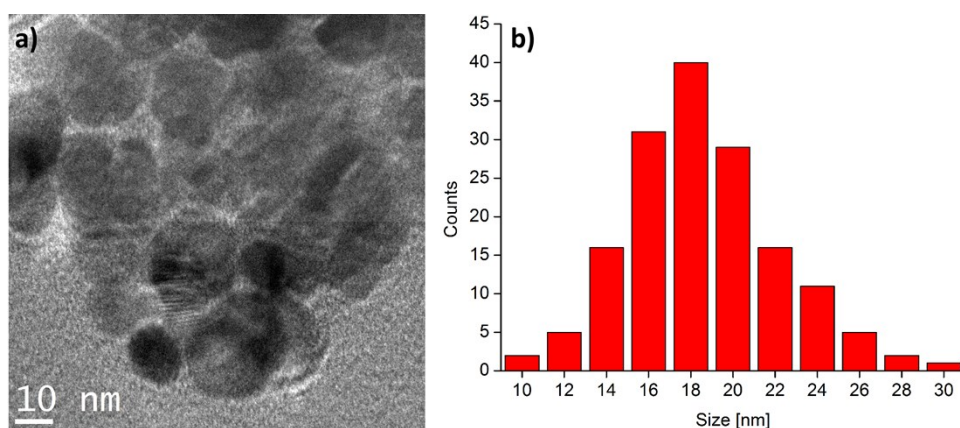

**Fig. S2** (a) HR-TEM image and (b) particle-size distribution of the PbSe nanoparticles obtained from the microwave-assisted decomposition of **3a** in a mixture of ODC, TOP and [BMIm][NTf<sub>2</sub>], giving an average particle size of 19 ± 4 nm.

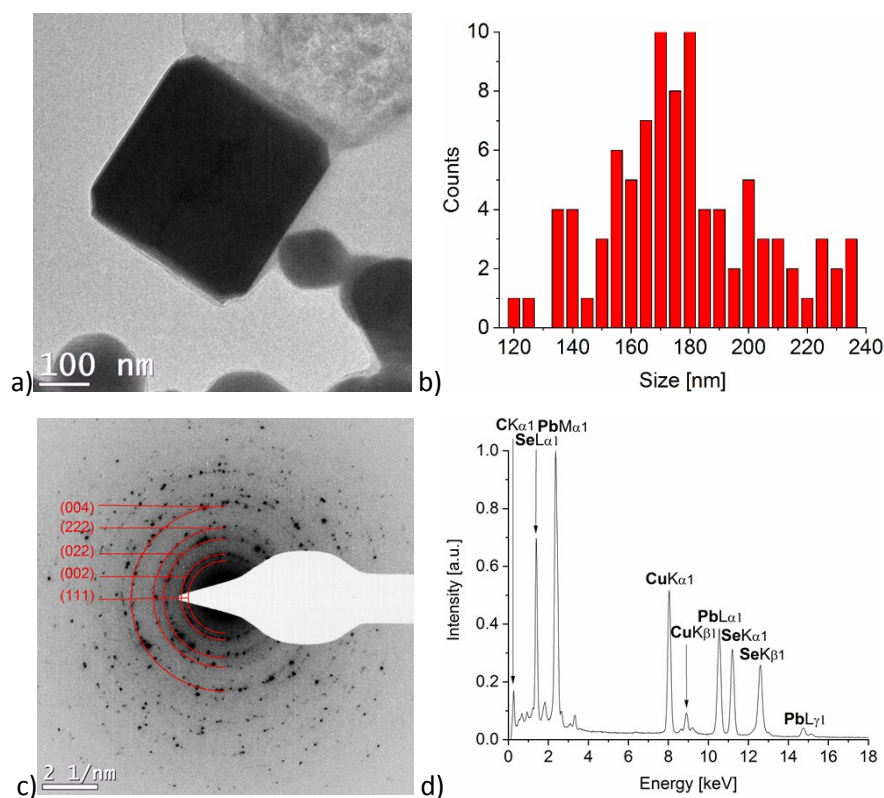

**Fig. S3** Additional information on the PbSe particles obtained from the microwave-assisted decomposition of **3a** in [BMIm][NTf<sub>2</sub>] at 180 °C: (a) Detailed image of a separated particle with an edge length of 267 nm, (b) particle-size distribution, giving an average diameter of 178 ± 90 nm, (c) SAED and (d) EDX-analysis.

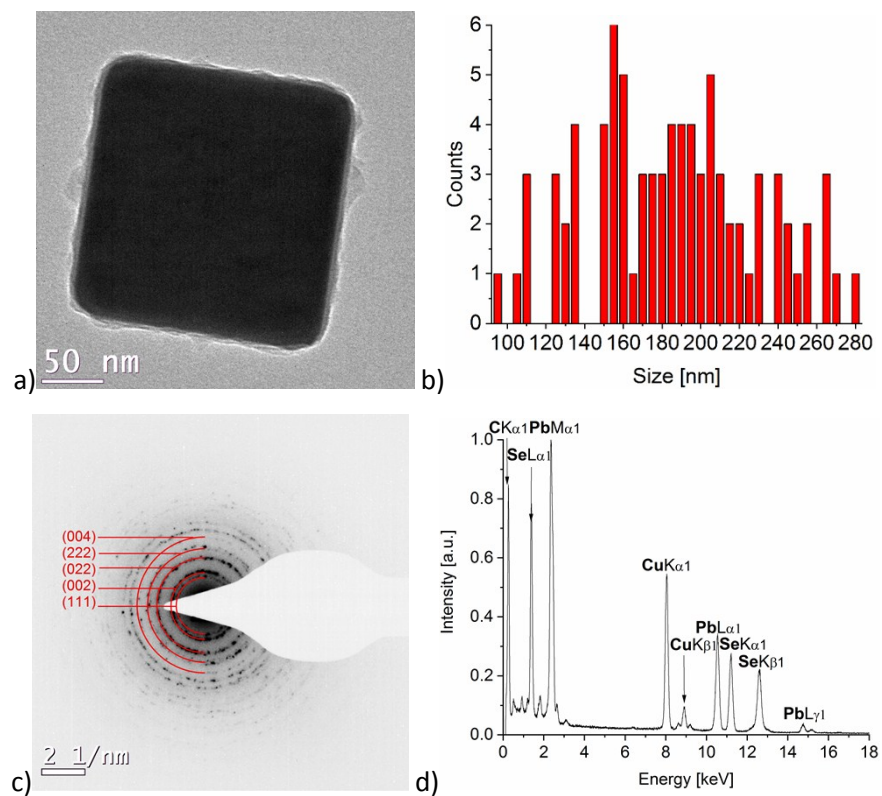

**Fig. S4** Additional information on the PbSe particles obtained from the microwave-assisted decomposition of **3a** in [BMIm][NTf<sub>2</sub>] at 200 °C: (a) Detailed image of a separated particle with an edge length of 213 nm, (b) particle-size distribution, giving an average diameter of 186 ± 116 nm, (c) SAED and (d) EDX-analysis.

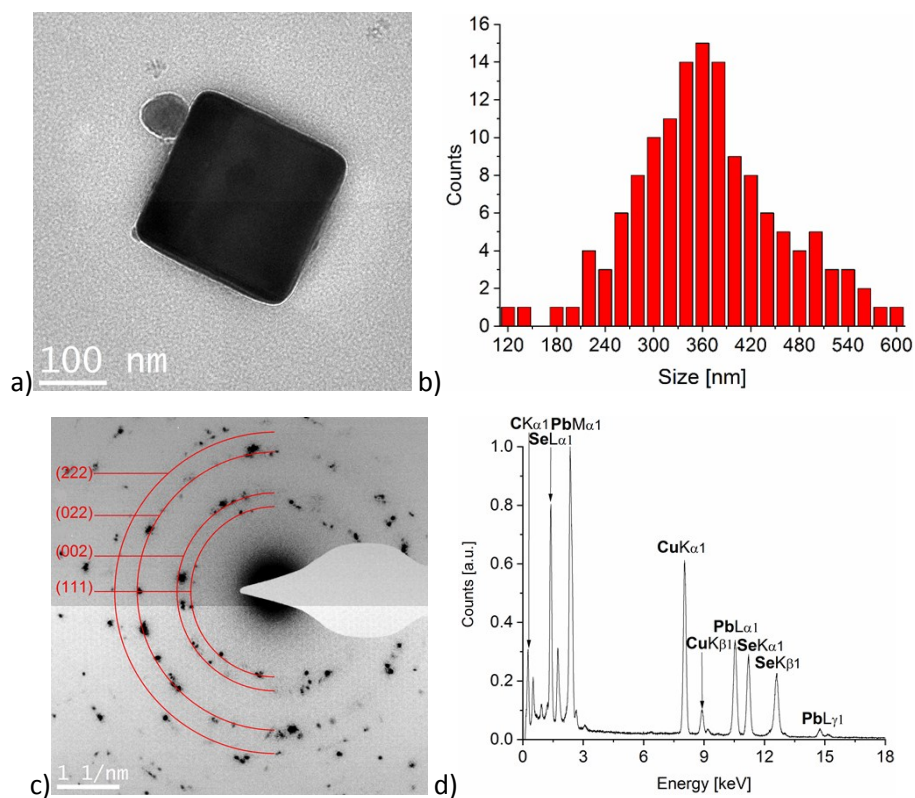

**Fig. S5** Additional information on the PbSe particles obtained from the microwave-assisted decomposition of **3a** in [BMIm][NTf<sub>2</sub>] in PC (50 vol. %) at 200 °C: (a) Detailed image of a separated particle with an edge length of 411 nm and (b) particle-size distribution, giving an average diameter of  $366 \pm 90$  nm, (c) SAED and (d) EDX-analysis.

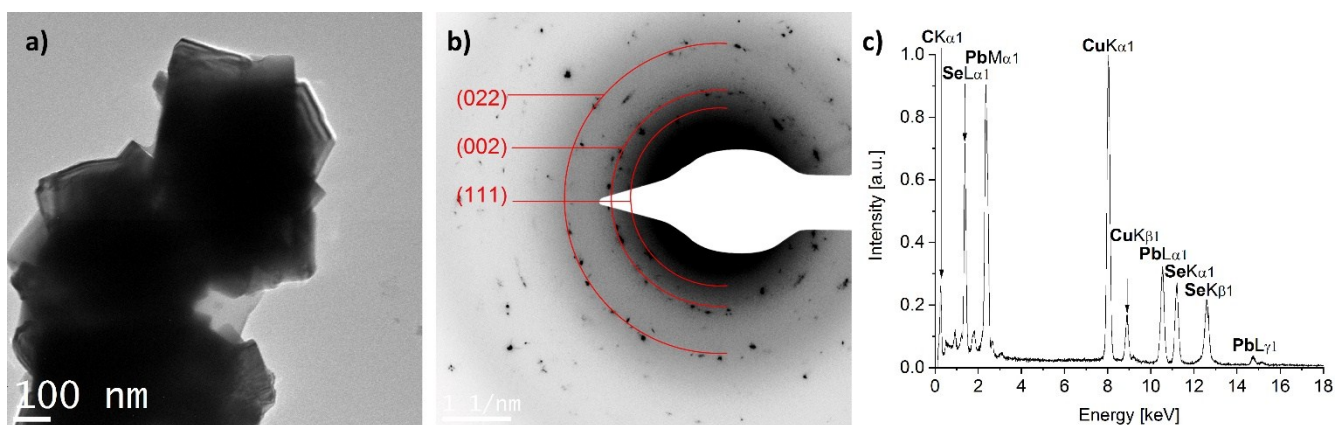

**Fig. S6** Additional information on the PbSe particles obtained from the microwave-assisted decomposition of **3a** in PC at 200 °C: (a) Detailed image of an intergrown particle assembly, (b) SAED and (c) EDX-analysis.

### Section SIII. Crystallographic and refinement details

Table S1 Crystallographic and refinement details for compounds **2**, **3**, **1a**, **2a** and **3a**.

|                                                 | <b>2</b>                                             | <b>3</b>                                             | <b>1a</b>                                                                       | <b>2a</b>                                                                       | <b>3a</b>                                                                                       |
|-------------------------------------------------|------------------------------------------------------|------------------------------------------------------|---------------------------------------------------------------------------------|---------------------------------------------------------------------------------|-------------------------------------------------------------------------------------------------|
| <b>Empirical formula</b>                        | C <sub>16</sub> H <sub>23</sub> ClN <sub>2</sub> OSe | C <sub>16</sub> H <sub>23</sub> ClN <sub>2</sub> OSe | C <sub>32</sub> H <sub>28</sub> N <sub>6</sub> O <sub>6</sub> PbSe <sub>2</sub> | C <sub>26</sub> H <sub>34</sub> N <sub>4</sub> O <sub>2</sub> PbSe <sub>2</sub> | C <sub>32</sub> H <sub>44</sub> Cl <sub>2</sub> N <sub>4</sub> O <sub>2</sub> PbSe <sub>2</sub> |
| <b>Formula weight</b>                           | 373.77                                               | 373.77                                               | 957.71                                                                          | 799.68                                                                          | 952.72                                                                                          |
| <b>Crystal system</b>                           | monoclinic                                           | Triclinic                                            | monoclinic                                                                      | orthorhombic                                                                    | orthorhombic                                                                                    |
| <b>Space group</b>                              | P2 <sub>1</sub> /c                                   | P-1                                                  | P2 <sub>1</sub> /n                                                              | Iba2                                                                            | Iba2                                                                                            |
| <b>a/Å</b>                                      | 10.6871(5)                                           | 8.1942(7)                                            | 14.1737(2)                                                                      | 20.7267(5)                                                                      | 17.9384(5)                                                                                      |
| <b>b/Å</b>                                      | 15.8440(6)                                           | 10.8431(8)                                           | 14.1942(2)                                                                      | 13.0349(11)                                                                     | 19.0184(12)                                                                                     |
| <b>c/Å</b>                                      | 10.4873(4)                                           | 11.8118(12)                                          | 16.5168(2)                                                                      | 10.1701(2)                                                                      | 10.4156(4)                                                                                      |
| <b>α/°</b>                                      | 90.00                                                | 64.775(8)                                            | 90.00                                                                           | 90.00                                                                           | 90.00                                                                                           |
| <b>β/°</b>                                      | 103.813(4)                                           | 69.712(8)                                            | 95.0944(16)                                                                     | 90.00                                                                           | 90.00                                                                                           |
| <b>γ/°</b>                                      | 90.00                                                | 80.596(6)                                            | 90.00                                                                           | 90.00                                                                           | 90.00                                                                                           |
| <b>Volume/Å<sup>3</sup></b>                     | 1724.43(12)                                          | 890.36(13)                                           | 3309.79(9)                                                                      | 2747.7(3)                                                                       | 3553.4(3)                                                                                       |
| <b>Z</b>                                        | 4                                                    | 2                                                    | 4                                                                               | 4                                                                               | 4                                                                                               |
| <b>ρ<sub>calc</sub>/mg/mm<sup>3</sup></b>       | 1.440                                                | 1.394                                                | 1.922                                                                           | 1.933                                                                           | 1.781                                                                                           |
| <b>m/mm<sup>-1</sup></b>                        | 2.333                                                | 2.259                                                | 7.350                                                                           | 8.820                                                                           | 6.981                                                                                           |
| <b>F(000)</b>                                   | 768                                                  | 384                                                  | 1840                                                                            | 1536                                                                            | 1856                                                                                            |
| <b>Crystal size/mm<sup>3</sup></b>              | 0.09×0.07×0.06                                       | 0.13×0.12×0.03                                       | 0.08×0.03×0.02                                                                  | 0.07×0.04×0.03                                                                  | 0.16×0.02×0.01                                                                                  |
| <b>2θ range</b>                                 | 6.48 to 58.6°                                        | 5.84 to 58.86°                                       | 6.2 to 58.82°                                                                   | 6.42 to 58.9°                                                                   | 6.24 to 58.9°                                                                                   |
| <b>Reflections collected</b>                    | 8277                                                 | 7450                                                 | 13648                                                                           | 4251                                                                            | 5214                                                                                            |
| <b>Indep. reflections (Rint)</b>                | 3951 (0.0231)                                        | 4067 (0.0270)                                        | 7523 (0.0266)                                                                   | 2543 (0.0252)                                                                   | 3244 (0.0204)                                                                                   |
| <b>Data/restraints/parameters</b>               | 3951/0/192                                           | 4067/0/194                                           | 7523/0/428                                                                      | 2543/1/162                                                                      | 3244/1/199                                                                                      |
| <b>Goodness-of-fit on F<sup>2</sup></b>         | 1.021                                                | 1.052                                                | 1.036                                                                           | 0.990                                                                           | 1.040                                                                                           |
| <b>Final R indexes<br/>[I&gt;=2σ (I)]</b>       | R <sub>1</sub> = 0.0314<br>wR <sub>2</sub> = 0.0711  | R <sub>1</sub> = 0.0320<br>wR <sub>2</sub> = 0.0661  | R <sub>1</sub> = 0.0308<br>wR <sub>2</sub> = 0.0647                             | R <sub>1</sub> = 0.0254<br>wR <sub>2</sub> = 0.0429                             | R <sub>1</sub> = 0.0238<br>wR <sub>2</sub> = 0.0465                                             |
| <b>Final R indexes<br/>[all data]</b>           | R <sub>1</sub> = 0.0405<br>wR <sub>2</sub> = 0.0757  | R <sub>1</sub> = 0.0389<br>wR <sub>2</sub> = 0.0699  | R <sub>1</sub> = 0.0434<br>wR <sub>2</sub> = 0.0700                             | R <sub>1</sub> = 0.0316<br>wR <sub>2</sub> = 0.0461                             | R <sub>1</sub> = 0.0299<br>wR <sub>2</sub> = 0.0489                                             |
| <b>Largest diff. peak/hole /eÅ<sup>-3</sup></b> | 0.729/-0.498                                         | 0.547/-0.465                                         | 1.492/-1.246                                                                    | 0.831/-0.700                                                                    | 0.580/-0.536                                                                                    |
| <b>CCDC deposition code</b>                     | 1586975                                              | 1586977                                              | 1586978                                                                         | 1586974                                                                         | 1586976                                                                                         |
